# Supplementary material for: Pericytes Elicit Resistance to Vemurafenib and Sorafenib Therapy in Thyroid Carcinoma via the TSP-1/TGFβ1 Axis
Source: Oxford University Press journal article supplement (doi:10.1158/1078-0432.ccr-18-0693), 2018-08-03
Supplement: 10780432ccr180693-sup-197822_3_supp_4910479_pck81h.doc [file 10780432ccr180693-sup-197822_3_supp_4910479_pck81h.doc]

**Supplementary Materials and Methods**

**Cell cultures**

We used authenticated (STR and DNA sequencing for KTC1; DNA sequencing and RT-PCR for TPC1) KTC1 and TPC1 human thyroid carcinoma cell lines. KTC1 is a spontaneously immortalized human thyroid carcinoma cell line, which harbors the heterozygous BRAFWT/V600E mutation. It was established from the metastatic pleural effusion from a recurrent and radioiodine (RAI) refractory papillary thyroid carcinoma (PTC) in a 60-year-old male patient by Dr. J. Kurebayashi (Department of Breast and Thyroid Surgery Kawasaki Medical School Kurashiki, Japan) and provided by Dr. Rebecca E. Schweppe (University of Colorado, USA). TPC-1 cell line (PTC-derived, harboring RET/PTC-1 and with BRAFWT/WT) was provided by Dr. F. Frasca (University of Catania, Italy). Human thyroid carcinoma cells were validated by genomic/genotyping analyses (e.g. BRAFV600Emutation analysis) and were grown in 4.5 gr./dl DMEM (cat#10-013-CV, Corning, USA) medium supplemented with 10% FBS (fetal bovine serum, Atlanta Biologicals cat#S11550, Atlanta, GA, USA) and plus ampicillin/streptomycin antibiotic and anti-mycotic solution (Corning, USA). Human pericytes were obtained from Promo Cell (Germany) and grown in 1:1 DMEM:HAM’s F12 (CellGro, USA) supplemented with 10% FBS and penicillin/streptomycin/amphotericin according to Sadow et al. . During *in vitro* assays, cells were grown in DMEM growth medium supplemented with 0.2% FBS. The human embryonic kidney (HEK) 293T cell line was kindly provided by Dr. Laura E. Benjamin and grown in DMEM supplemented with 10% FBS plus ampicillin/streptomycin antibiotic and antimycotic solution 100× (Corning, USA). The use of these cell lines was approved from the committee on microbiologal safety (COMS, Beth Israel Deaconess Medical Center (BIDMC), Boston, MA, USA).

**Vemurafenib**

For our *in vitro* assays, we used 10 mM vemurafenib (PLX4032, RG7204, Cat#S1267) (Selleckchem, USA) dissolved in 100% dimethyl sulfoxide (DMSO, vehicle). Ten mM was diluted to 2 mM in 100% DMSO; then, intermediate doses of vemurafenib were prepared in 100% DMSO; finally intermediate doses were diluted in 0.2% FBS DMEM in order to achieve the desired final concentrations of 1 µM, 2.5 µM, 5 µM, and 10 µM vemurafenib maintaining a constant final concentration at 2% DMSO for optimal solubility. Vehicle was used as untreated control (2% DMSO diluted in 0.2% FBS DMEM). Before adding treatments, cells were washed with PBS from 10% FBS DMEM.

**Sorafenib**

Sorafenib tosylate (Cat#S1040, Selleckchem, USA), a multikinase inhibitor, was dissolved in 100% DMSO (Sigma, USA) according to manufacturer instructions to produce 10 mM stock solution. Ten mM was diluted to 2 mM in 100% DMSO; then, intermediate doses of sorafenib were prepared in 100% DMSO; finally intermediate doses were diluted in 0.2% FBS DMEM in order to achieve the desired final concentrations of 1 µM, 2.5 µM, 5 µM, and 10 µM sorafenib maintaining a constant final concentration at 2% DMSO for optimal solubility. Vehicle was used as untreated control (2% DMSO diluted in 0.2% FBS DMEM). Before adding treatments, cells were washed with PBS from 10% FBS DMEM.

**SRI31277 peptide**

Peptide SRI31277 was synthesized by BioMatik USA (Wilmington, DE) and purity confirmed at Southern Research (Birmingham, AL). We reconstituted it in 0.2% FBS DMEM) to achieve the stock concentration of 2.6 mM. Then, SRI31277 was diluted in 0.2% FBS DMEM to achieve a final concentration of 1 μM, 2.5 μM, 5 μM, 10 μM, 25 μM, 50 μM, or 100 μM.

**Recombinant proteins**

We used recombinant human latent TGFβ1 protein (cat#299-LT) and recombinant human active TGFβ1 protein (Ala279-Ser390) (cat#240-B) by R&D Systems; recombinant human PDGFB (Thermo Fisher Scientific, MA, USA); and recombinant human VEGFA (Thermo Fisher Scientific, MA, USA) proteins. Half-life of TGFβ1 protein in culture medium has been previously reported .

**Western blotting**

Cells were grown in 10-cm dishes in 10% FBS DMEM. They were treated with vehicle (DMSO), vemurafenib, sorafenib or combined therapy with vemurafenib plus sorafenib in the presence of 0.2% FBS DMEM when reached about 90-100% confluence. Cells were lysed at the indicated time points. Western blotting assays (protein loading: for TSP-1 blots: 1-30 µg; for pERK1/2 and tERK1/2: 5-30 µg; for pAKT and tAKT: 15-30 µg; for CRAF: 15-30 µg; for pSMAD3: 30 µg; for pVEGFR2, tVEGFR2, pPDGFRB, and tPDGFRB: 70 µg) were performed according to a standard procedure, and the protein lysis buffer was composed of 10 mM Hepes (pH 7.40), 150 mM NaCl, 5 mM EDTA, 1 mM EGTA, 1 mM sodium vanadate, 5 mM sodium fluoride, and 1% Triton X-100; protease and phosphatase inhibitors (Thermo Fisher Scientific, MA, USA) were used for protein extractions . The band’s intensity of every protein was normalized to the housekeeping protein band (actin or tubulin) and quantified by densitometry analysis (ImageJ software, USA). We used the following antibodies: tubulin (cat#T9026, Sigma-Aldrich, USA), actin (Sigma-Aldrich, USA), actin-HRP (Santa Cruz, USA), phospho-ERK1/2 (cat#9101, Cell Signaling, USA), total-ERK1/2 (cat#9102, Cell Signaling, USA), phospho-MEK1/2 (cat#9121, Cell Signaling, USA), phospho-AKT (cat#4060, Cell Signaling, USA), total-AKT (cat#9272, Cell Signaling, USA), phospho-SMAD3 (cat#9520S, Cell Signaling, USA), phospho-VEGFR2-Y1059 (cat#3817S, Cell Signaling, USA), total VEGFR2 (cat#2479S, Cell Signaling, USA), phospho-PDGFRB-Y751 (cat#3161S, Cell Signaling, USA), total PDGFRB (cat#32570, Abcam, USA), and TSP-1 clone MA-1 for Western blot (kindly provided by Dr. Jack Lawler, BIDMC, Harvard Medical School, Boston, MA).

**Assessment of vemurafenib and sorafenib doses for combined treatment**

In order to assess the most effective doses of combined therapy with vemurafenib plus sorafenib, KTC1 cells were seeded in the 24-well dishes (one dish per each time point) and treated when they did reach out 100% cell density per well. Cells were treated for 48 hours in the presence of 0.2% FBS DMEM with: 1, 2.5, 5, or 10 µM of either vemurafenib or sorafenib; or combined therapy with vemurafenib plus sorafenib combining all above doses. Control cells were treated with vehicle (2% DMSO). Cells were fixed with 4% paraformaldehyde for 10 minutes at room temperature. Then, we aspirated 4% paraformaldehyde and washed twice with PBS. We aspirated it, and we stained cells with 5 µM Hoechst 33342 (Nexcelom, USA) in PBS using 500 µL for each 6-wells for 15 minutes. Total number of cells/well was analyzed by using the Celigo image cytometer (Nexcelom, USA). Data were plotted as a matrix of cell count using GraphPad Prism 6 or excel. Synergy, sub-additive or additive activity for the combined treatments of vemurafenib plus sorafenib was calculated using GeoGebra Classic and applying Loewe test method according to Tallarida .

**Cell proliferation assay**

Cells were seeded at about 90% confluence in 6-well dishes and grown in 10% FBS DMEM. After 24 hrs, cells were treated with 10 µM vemurafenib, 2.5 µM sorafenib, combined therapy with 10 µM vemurafenib plus 2.5 µM sorafenib, or vehicle (2% DMSO) for 48 hours in the presence of in 0.2% FBS DMEM. After 45 hours cells were pulsed with 10 µM BrdU for 3 hours, then, adherent cells were trypsinized and pelleted with the supernatant. Cell pellets were fixed in pre-chilled (−20°C) ethanol 75%, pelleted at 400 × g at room temperature, suspended in 0.5% PBS/BSA, incubated in 2M HCl 0.5% BSA for 20 min at room temperature, washed with 0.5% PBS/BSA, and centrifuged 5 minutes at 400 × g at room temperature. The cells were suspended in 0.1M sodium borate (pH 8.5) for 2 min at room temperature, washed with 0.5% PBS/BSA, and centrifuged 5 min at 400 × g at room temperature. Cells were pelleted and washed twice with 0.5% PBS/BSA. For the BrdU staining, cell samples were suspended according to the manufacturer’s instructions in a PBS 0.5% Tween-20 solution containing anti-FITC–conjugated BrdU antibody (BD Biosciences). Cells were pelleted and washed twice with 0.5% PBS/BSA. Finally, cell pellets were suspended in 500 μL of propidium iodide (PI) (Thermo Fisher Scientific, MA, USA) solution to a final concentration of 10 μg/mL plus RNase 10 mg/mL (Sigma) and incubated at room temperature for 30 minutes. Stained cells were analyzed by flow cytometry using a FACS Gallios (Beckman Coulter, Miami, FL, USA).

**Cell death assay**

Cells were seeded at about 90% confluence in 6-well dishes and grown in 10% FBS DMEM. After 24 hrs, cells were treated with 10 µM vemurafenib, 2.5 µM sorafenib, combined therapy with 10 µM vemurafenib plus 2.5 µM sorafenib, or vehicle (2% DMSO) for 48 hours in the presence of 0.2% FBS DMEM. After 48 hours, adherent cells were trypsinized and pelleted with the supernatant. Cell pellets were fixed at 4 °C with 75% ethanol. Cell death was assessed using annexin V Alexa Fluor 488 and propidium iodide (PI) double staining (Life Technologies, MA, USA) by flow cytometry analysis (FACS Gallios, Beckman Coulter, Miami, FL, USA) according to the manufactures instructions.

**Cell viability assay**

Cells number (viability) was measured by crystal violet staining. KTC1 and TPC1 cells, or pericytes were seeded at a density of 30,000 cells per well in 24-well plates. After 48 hrs, cells were treated with 10 µM vemurafenib, 2.5 µM sorafenib, combined therapy with 10 µM vemurafenib plus 2.5 µM sorafenib, or vehicle (2% DMSO) for 48 hours in the presence of 0.2% FBS DMEM. After 48 hours, growth medium was gently aspirated, and cells were fixed with 10% formalin for 15 minutes. Then, we aspirated formalin, washed once with distilled water and stained with 0.05% crystal violet (Thermo Fisher, MA, USA) for 30 minutes. After washing and air dry, we added 200 microliters of 100% methanol to each well, and absorbance was read at 540 nm. The IC50 (50% maximal inhibitory concentration) for cell viability was determined using the above drug doses.

**Model of pericyte-derived secretome**

Cells were seeded at about 90% confluence in 6-well dishes in DMEM growth medium supplemented with 10% FBS. We prepared duplicated wells for each treatment condition. Forty-eight hrs following cell seeding, pericytes were treated for 5 hours with 10 µM vemurafenib, 2.5 µM sorafenib, combined therapy with 10 µM vemurafenib plus 2.5 µM sorafenib, or vehicle (2% DMSO) in the presence of 0.2% FBS DMEM growth medium. Following the 5 hrs of treatments, Following the 5 hrs of treatments, the low concentration of 0.2% FBS DMEM growth medium enriched by cell-derived secreted factors was defined as ‘secretome’ and was normalized to the same cell growth medium in order to subtract background; then, it was collected and separated from dead cell debris by short spin. We collected an aliquot of secretomes volume for ELISA analysis. Additionally, the remaining volume of all four secretomes was used to treat BRAFWT/V600E-KTC1 and BRAFWT/WT-TPC1 for 5 hours. At the same time another condition included BRAFWT/V600E-KTC1 and BRAFWT/WT-TPC1 cells (both cell lines were seeded at 90% confluence in the presence of 10% FBS DMEM growth medium the day prior to treatments) directly treated (without pericyte secretome) for 5 hours with 10 µM vemurafenib, 2.5 µM sorafenib, combined therapy with 10 µM vemurafenib plus 2.5 µM sorafenib, or vehicle (2% DMSO) in the presence of 0.2% FBS DMEM growth medium. Also, after secretomes collection, adherent pericytes were lysed for protein extraction in order to perform Western blotting assays. After 5 hours of treatments of the BRAFWT/V600E-KTC1 and BRAFWT/WT-TPC1 thyroid tumor cells, we collected an aliquot of secretomes volume for ELISA analysis. Then, we lysed the adherent thyroid tumor cells for protein extraction in order to perform for Western blotting assays.

**Cell transfections for lentivirus production**

HEK 293T cells (5 ×105) were grown in 60-mm plates and transfected using Fugene-6 (Roche) in OptiMEM (Invitrogen) for 48 hours according to manufacturer instructions.

**Overexpression technique**

We used the FUW-Luciferase-mCherry-puro (luciferase/Cherry) plasmid generated from Dr. Andrew L. Kung (Memorial Sloan Kettering Cancer Center, NYC, USA). This plasmid was kindly provided along with the packaging plasmids (psPAX2, pMD2-G, and RTR2) by Dr. Judy Lieberman and Dr. Minh T.N. Le (Children’s Hospital, Harvard Medical School, Boston, USA) . Viral transductions were performed as follows: HEK 293T cells were seeded in 10-cm dishes and co-transfected the next day with each virus and helper plasmids. Media with progeny virus from transfected HEK 293T cells were collected 48 hours later and filtered with 0.45 μm filters (Millipore, USA) and freshly used to transduce KTC1 cells for 3-6 hours in the presence of 8 μg/mL polybrene (Sigma). Finally, stable transduced KTC1 cells with luciferase/Cherry viral vector were selected with both puromycin (Sigma-Aldrich, USA) and then sorted for Cherry expression by flow cytometry (MoFlo/FACSAria Sorting; Beckman Coulter, USA). Efficiency of luciferase expression in KTC1 cells was assessed by BLI (see above paragraph). All assays were performed in triplicate.

**Silencing technique**

We used TSP-1 and helper plasmids according to Nucera et al. . Viral transductions were performed as follows: HEK 293T cells were seeded in 10-cm dishes and co-transfected the next day with each virus and helper plasmids. Media with progeny virus from transfected HEK 293T cells were collected 48 hours later and filtered with 0.45 μm filters (Millipore, USA) and freshly used to transduce pericytes for 6 hours in the presence of 8 μg/mL polybrene (Sigma). Finally, stable transduced pericytes with viral vectors were selected with puromycin (Sigma-Aldrich). Efficiency of TSP-1 knockdown in pericytes was assessed by western blotting. All assays were performed in duplicate.

**Co-culture assays**

mCherry-KTC1 and pericytes were seeded at 150,000 cells per well in 6-well dishes or 30,000 cells per well in 24-well dishes. After 48 hrs, cells were treated for 48 hours with 10 µM vemurafenib, 2.5 µM sorafenib, combined therapy with 10 µM vemurafenib plus 2.5 µM sorafenib, or vehicle (2% DMSO) in the presence of 0.2% FBS DMEM growth medium. After 48 hours, the low concentration of 0.2% FBS DMEM growth medium enriched by cell-derived secreted protein factors was defined as ‘secretome’ and was normalized to the same cell growth medium in order to subtract background; then, it was collected for ELISA analysis and separated from dead cell debris by short spin. Adherent cells were fixed with 10% formalin for 20 minutes at room temperature. Cells were then washed with PBS. Cells were stained with 5 µM Hoechst 33342 (Nexcelom, USA) diluted in PBS for 15 minutes. Total number of cells (cell growth)/well was analyzed by Celigo image cytometer (Nexcelom, USA). Data were plotted as matrix of cell count using both GraphPad Prism 6 and excel software.

**Wound-healing assay**

Cell motility was assessed utilizing the wound-healing (motility) assay. Cells were harvested and seeded to 100% confluency in a 6-wells plate and cultured in 10% FBS DMEM for 24 hrs. Media was aspirated from each well, washed with PBS and a scratch was made on the cell monolayer with a 10 µL pipette tip. Each well was photographed at time zero (baseline) to assess the scratch and thereafter treated with 10 µM vemurafenib, 2.5 µM sorafenib, 10 µM vemurafenib plus 2.5 µM sorafenib or vehicle (2% DMSO) in 0.2% FBS DMEM and incubated at 37 °C for 7 hours. Each well was photographed and images were captured at 0 and 7 hrs and quantified using Image J software (USA). We calculated percentage of healing area at 7 hrs compared to 0 hrs (basal area) for each condition. Statistical analysis was performed comparing drug treatments vs. vehicle.

**Orthotopic mouse model**

All animal work was approved and done in accordance with federal, local, and institutional guidelines (IACUC) at the Beth Israel Deaconess Medical Center (Boston, MA, USA). Human metastatic KTC1 tumor-derived cells harboring the heterozygous BRAFV600E mutation engineered to express luciferase were cultured in 10-cm dishes and grown in DMEM medium supplemented with 10% FBS, penicillin, streptomycin, and amphotericin at 37C with 5% CO2 atmosphere. On the day of tumor implantation, the cells were trypsinized, gently centrifuged, and suspended in serum-free DMEM growth medium to achieve a cell suspension concentration ranged between 3.5×106 and 5×106 cells/10 µL. The cells were kept on ice until implantation. KTC1 cells were orthotopically injected using a Hamilton syringe (Fischer, MA, USA) in the right thyroid of 9 weeks old male NSG mice (strain name: NOD.Cg-Prkdcscid Il2rgtm1Wjl/SzJ; stock number: 005557) (The Jackson Laboratory, Bar Harbor, Maine, USA) (BIDMC IRB, Boston) (n=5 per group) according to our previous experimental procedures . Mice were randomly divided into four equal groups of 5 mice for the purpose of establishing a time course of tumor cell growth and response to the late therapeutic intervention with vemurafenib, sorafenib, combined therapy with vemurafenib plus sorafenib, or vehicle. Treatments were started 6 weeks (late interventional trial) after KTC1 tumor cells implantation and performed for 5 weeks.

**Vemurafenib and sorafenib preparation for mouse treatment**

For *in vivo* studies, drug suspensions were prepared for vemurafenib (10 mg/ml in 2% hydroxypropylcellulose) (Selleckchem, TX, USA), and sorafenib (3.75 mg/mL according to Fendrich et al. ) (LC Laboratories, Woburn, MA, USA). Freshly prepared drug suspensions were stored at 4°C and used within 48 hours. Mice were dosed once daily with vehicle alone (control), with vemurafenib (100 mg/kg), sorafenib (30 mg/kg), or combination of vemurafenib and sorafenib as indicated by oral gavage using a 22G needle.

**Luciferase bioluminescence imaging (BLI)**

Following a baseline imaging session, all mice were randomized and placed into treatment groups. All mice were imaged at the Longwood small animal imaging facility of Harvard Medical School on a weekly basis for the duration of the study. Mice were anesthetized using a mixture of oxygen and 2.5 % isoflurane, prior to imaging. 200 µl of the luciferin substrate, D-Luciferin (Perkin Elmer Life sciences, Hopkinton, MA) in phosphate buffered saline (PBS) (1.5 mg/ml) was injected intraperitoneally. Following a ten minute uptake period, the mice were imaged by the IVIS 50 system (Perkin Elmer, Hopkinton, Massachusetts). The settings used for all acquisitions included a 1 minute exposure, medium binning number, and FOV of level C. The images were acquired and analyzed using the Living Image software (Perkin Elmer, Hopkinton, Massachusetts). For the analysis, a set ROI (region of interest) was drawn over the tumor to obtain total flux (photons/second).

**SPECT/CT imaging**

All mice were imaged at the Longwood small animal imaging facility of Harvard Medical School on the NanoSPECT/CT imaging system (Mediso, Budapest, Hungary). Multi-pinhole collimators were fitted on the machine, prior to all scans, to allow for high resolution mice scan acquisitions. A standard protocol for SPECT imaging was performed, where 350-400 µCi of Tc-99 Pertechnetate in saline was injected retro-orbitally using an injection volume of 50 µL. After allowing for an hour of 'wash out' time, animals received a SPECT scan, followed by a CT scan on the same system. All mice were anesthetized using a mixture of oxygen and isoflurane gas at a concentration of about 2-2.5% for the duration of the scan. The scans were acquired using Nucline software (Mediso, Budapest, Hungary). All scans were analyzed using Vivoquant software (INVICRO, Boston, Massachusetts).

**Histology, immunohistochemistry, and immunocytochemistry**

Histopathology evaluation of orthotopic tumor tissues was performed by a pathologist (P.S.) on hematoxylin and eosin (HE)-stained formalin-fixed paraffin-embedded (FFPE) tissues. All tissue specimens were fixed with 10% buffered formalin phosphate and embedded in paraffin blocks. Pericytes were collected from *in vitro* cultures, fixed with 10% buffered formalin phosphate and embedded in histoGel (Thermo Fisher Scientific, MA, USA) for cell block preparation according to the manufacturer’s protocol. These were visualized with an Olympus BX41 microscope and the Olympus Q COLOR 5 photo camera (Olympus Corp., Lake Success, NY, USA). Four µm sections of BRAFV600E-positive human KTC1 tumor-derived orthotopic mouse tissues (serial sections) were used for immunohistochemistry (IHC) and immunocytochemistry. After baking overnight at +37C, deparaffinization with xylene/ethanol and rehydration was performed. IHC analysis utilized primary antibodies **(Supplementary Table 1)**. The sections, treated by pressure cooker for antigen retrieval (Biocare Medical, Concord, CA), were incubated at 123C in citrate buffer (Dako Target Retrieval Solution, S1699; DAKO Corp.), cooled and washed with PBS. Antigen retrieval was performed for 60 minutes. The primary antibody was detected using a biotin-free secondary antibody (K4011) (Dako Envision system) and incubated for 30 min. All incubations were carried out in a humid chamber at room temperature. Slides were rinsed with PBS between incubations. Sections were developed using 3,3-diaminobenzidine (Sigma Chemical Co.) as a substrate and were counterstained with Mayer’s hematoxylin . The IHC marker expression was assessed semiquantitatively using the following scoring method: 0 (negative), 1 (<50% positive cells), and 2 (≥50% positive cells). Microvascular density is defined by a number of vessels per microscope field showing CD31 (a marker of blood endothelial cells). Trichrome staining was performed according to manufacturer instructions (Ventana, USA) in order to assess collagen deposition in the extracellular matrix of PTC.

**Transmission Electron Microscopy (TEM)**

Fixation, dehydration, and embedding were carried out according to previous procedures (Dvorak AM. Monograph-Procedural guide to specimen handling for the ultrastructural pathology service laboratory. J Electron Microsc Tech 1987; 6:255–301). One um slide sections were stained with alkaline Giemsa stain for study by light microscopy, and 70- to 80-nm thin sections were examined by electron microscopy with the Philips CM10 electron microscope (Philips, Eindhoven, The Netherlands).

**ELISA**

The secretome collected from pericytes, KTC1, or TPC1 cells was collected, removed from dead cell debris by short spin, and diluted 1:3 with DMEM growth medium supplemented with 0.2% FBS. The levels of secreted factors such as VEGFA, FGFβ, EGF, Leptin, TNFα, IL6, and IGF-1 (protein levels, pg/mL) were determined by ELISA (Enzyme-linked immunosorbent) assay (cat# EA-1011, Signosis, CA, USA) according to manufacturer instructions. Secreted TSP-1 and TGFβ1 protein levels were also determined by human Angiogenesis Strip I Quantikine ELISA assay kit (cat# DTSP10 for TSP-1, cat# DB100B for TGFβ1; R&D Systems, MN, USA) according to manufacturer instructions. In the TGFβ1 ELISA, samples were acidified (HCL, hydrochloric acid) according to the R&D Systems manufacturer’s protocol in order to have immunoreactive TGFβ1 detectable by the Quantikine ELISA assay kit and measure total TGFβ1. Activation of endogenous TGFβ1 protein was obtained without acidification procedure according to the R&D Systems manufacturer’s protocol. ELISA plates were read at 450 nm OD. Secreted protein levels were normalized to cell growth medium (DMEM supplemented with 0.2% FBS) that was then analyzed to determine subtracted background.

**Differential gene expression, regulatory networks and pathways analysis, and pericytes abundance enrichment in PTC clinical samples.**

In order to determine the association of a select set of 23 genes linked to extracellular matrix functions, pericyte functions, angiogenesis, cell growth, adhesion/migration/invasion, and metastasis pathways with BRAF mutational status, we performed analysis on the genes PTC TCGA data. The normalized data was obtained from the TCGA web portal along with clinical information. Association with BRAFWTV600E vs. BRAFWT/WT status, BRAFWTV600E vs. BRAFWTV600E + hTERT mutations status, or BRAFWTV600E + hTERT mutations vs. BRAFWT/WT status was determined by implementing linear models of microarray analysis (Limma) that utilize moderate t-stats to determine the significance of association. After performing analysis on the 23 selected genes, we considered only those with raw p-values <0.05 and fold-change (FC) ≥1.2 or ≤-1.2 as significantly associated with BRAF mutational status.​ To further understand the biological cross-talk between genes that are significantly associated with BRAFV600E, we performed interactive network analysis based on protein-protein interaction, protein-DNA interaction, co-expression information. The interactive network was generated using GeneMANIA package in Cytoscape platform. We further explored the pathways interaction in this network by using Ingenuity Pathways Analysis (IPA). The pathways with raw p-value <0.01 were considered significant. Pericytes abundance analysis was assessed by the ssGSEA algorithm using normal thyroid (NT) and PTC TCGA samples RNAseq expression data as input. SSGSEA calculates separate enrichment scores for each pairing of a sample and gene set.  Each ssGSEA enrichment score represents the degree to which the genes in a particular gene set are coordinately up-regulated or down-regulated within a sample. We specified the positive signature for pericytes based on the expression of NG2, PDGFRB, αSMA, and CD90 genes. In order to identify samples enriched with pericytes, we used as negative signature the following genes: PECAM1, LYVE1 and CD34. Based on the score difference, we ranked the samples from the highest enrichment of pericytes signature to the least enrichment of pericytes signature. This approach provided insights towards association between pericytes enrichment and BRAF status.

**References**

1. Kurebayashi, J., et al., *All-trans-retinoic acid modulates expression levels of thyroglobulin and cytokines in a new human poorly differentiated papillary thyroid carcinoma cell line, KTC-1.* J Clin Endocrinol Metab, 2000. **85**(8): p. 2889-96.

2. Sadow, P.M., et al., *Role of BRAFV600E in the first preclinical model of multifocal infiltrating myopericytoma development and microenvironment.* J Natl Cancer Inst, 2014. **106**(8).

3. Lu, A., et al., *Inhibition of Transforming Growth Factor-beta Activation Diminishes Tumor Progression and Osteolytic Bone Disease in Mouse Models of Multiple Myeloma.* Am J Pathol, 2016. **186**(3): p. 678-90.

4. Rollins, B.J., et al., *Environment-dependent growth inhibition of human epidermal keratinocytes by recombinant human transforming growth factor-beta.* J Cell Physiol, 1989. **139**(3): p. 455-62.

5. Nucera, C., et al., *B-Raf(V600E) and thrombospondin-1 promote thyroid cancer progression.* Proc Natl Acad Sci U S A, 2010. **107**(23): p. 10649-54.

6. Tallarida, R.J., *Quantitative methods for assessing drug synergism.* Genes Cancer, 2011. **2**(11): p. 1003-8.

7. Le, M.T., et al., *miR-200-containing extracellular vesicles promote breast cancer cell metastasis.* J Clin Invest, 2014. **124**(12): p. 5109-28.

8. Nucera, C., et al., *A novel orthotopic mouse model of human anaplastic thyroid carcinoma.* Thyroid, 2009. **19**(10): p. 1077-84.

9. Bellelli, R., et al., *FOXM1 is a molecular determinant of the mitogenic and invasive phenotype of anaplastic thyroid carcinoma.* Endocr Relat Cancer, 2012. **19**(5): p. 695-710.

10. Fendrich, V., et al., *Sorafenib inhibits tumor growth and improves survival in a transgenic mouse model of pancreatic islet cell tumors.* ScientificWorldJournal, 2012. **2012**: p. 529151.

11. Nucera, C., et al., *Human galectin-3 immunoexpression in thyroid follicular adenomas with cell atypia.* J Endocrinol Invest, 2005. **28**(2): p. 106-12.

12. Nucera, C., et al., *Maternal thyroid hormones are transcriptionally active during embryo-foetal development: results from a novel transgenic mouse model.* J Cell Mol Med, 2010. **14**(10): p. 2417-35.
